# Supplementary material for: Spatial Owner-Dog Seroprevalence of Leptospira spp. Antibodies in Oceanic Islands and Costal Mainland of Southern Brazil
Source: MDPI journal article supplement (doi:10.3390/tropicalmed8040229), 2023-04-18
Supplement: s1 [file s1]

Supplementary Table 1 –Serogroups and serum titles of dogs on islands and the seashore mainland of Paraná state, southern Brazil

| Local              | Dog | Serogroup           | Sorovar (Title) |
|--------------------|-----|---------------------|-----------------|
| Ilha do Mel Island | 1   | Pyrogenes           | 15 (100)        |
|                    | 2   | Canicola            | 5 (100)         |
|                    |     | Pyrogenes           | 15 (100)        |
| Superagui Island   | 3   | Pyrogenes           | 15 (200)        |
|                    | 4   | Canicola            | 5 (100)         |
|                    |     | Icterohaemorrhagiae | 11A (200)       |
|                    |     | Pyrogenes           | 15 (100)        |
|                    | 5   | Pyrogenes           | 15 (400)        |
|                    | 6   | Canicola            | 5 (200)         |
|                    |     | Pyrogenes           | 15 (800)        |
|                    | 7   | Canicola            | 5 (100)         |
|                    |     | Icterohaemorrhagiae | 11A (100)       |
|                    |     | Pyrogenes           | 15 (200)        |
|                    | 8   | Canicola            | 5 (100)         |
|                    |     | Icterohaemorrhagiae | 11A (100)       |
|                    |     | Pyrogenes           | 15 (200)        |
| Peças Island       | 9   | Canicola            | 5 (400)         |
| Guaraqueçaba       | 10  | Pyrogenes           | 15 (100)        |
|                    | 11  | Australis           | 1B (100)        |
|                    | 12  | Pyrogenes           | 15 (100)        |
|                    | 13  | Pyrogenes           | 15 (100)        |
|                    | 14  | Pyrogenes           | 15 (100)        |
|                    | 15  | Canicola            | 5 (400)         |
| Pontal do Paraná   | 16  | Canicola            | 5 (100)         |
|                    |     | Icterohaemorrhagiae | 11A (100)       |
|                    | 17  | Australis           | 1A (100)        |
|                    | 18  | Australis           | 1A (100)        |
